# Supplementary material for: Comparison of Deep Sedation With General Anesthesia in Patients Undergoing Percutaneous Mitral Valve Repair
Source: PubMed Central journal article supplement — J Am Heart Assoc. 2017 Dec 2;6(12):e007485. doi: 10.1161/JAHA.117.007485 (PMC5779052; doi:10.1161/jaha.117.007485), 2017-12-02

# **SUPPLEMENTAL MATERIAL**

**Table S1.** Cause of bleeding complications

| <b>Cause of bleeding</b>                                   | <b>General anesthesia (N=9)</b> | <b>Deep sedation (N=29)</b> | <b>P value</b> |
|------------------------------------------------------------|---------------------------------|-----------------------------|----------------|
| Access site                                                | 56% (5/9)                       | 48% (14/29)                 | 0.70           |
| Endobronchial                                              | 11% (1/9)                       | -                           | 0.07           |
| Gastrointestinal                                           | 11% (1/9)                       | 19% (3/29)                  | 0.95           |
| Intracranial                                               | -                               | -                           | -              |
| Preexisting anemia, hemodilution caused by saline infusion | 11% (1/9)                       | 28% (8/29)                  | 0.31           |
| Other                                                      | 11% (1/9)                       | 14% (4/29)                  | 0.84           |

**Table S2.** Data on non-prophylactic antibiotic treatment

|                                       | <b>General anesthesia (N=72)</b> | <b>Deep sedation (N=199)</b> | <b>P value</b> |
|---------------------------------------|----------------------------------|------------------------------|----------------|
| Abx post PMVR other than prophylactic | 15% (11/72)                      | 15% (29/199)                 | 0.8            |
| Start Abx post PMVR (days mean)       | 2.5±3.1                          | 1.8±1.5                      | 0.3            |
| Duration Abx post PMVR (days mean)    | 8.4±3.9                          | 5.5±2.4                      | 0.03           |

Abx = antibiotic therapy, PMVR = percutaneous mitral valve repair

**Table S3.** Data of patients converted from DS to GA

|                                               | <b>Patient 1</b>                                         | <b>Patient 2</b>          | <b>Patient 3</b>                                            |
|-----------------------------------------------|----------------------------------------------------------|---------------------------|-------------------------------------------------------------|
| Reason for conversion                         | Accidental bronchial intubation inflicted with TEE probe | Drop of oxygen saturation | Severe epistaxis                                            |
| Subsequent complications during hospital stay | None                                                     | Pneumonia                 | Death due to multiple organ failure on day 9 post-procedure |
| Length of subsequent ICU stay [days]          | 2                                                        | 5                         | 9                                                           |
| Length of subsequent hospital stay [days]     | 5                                                        | 12                        | 9                                                           |

ICU = intensive care unit, TEE = transesophageal echocardiography

**Figure S1.** MR at baseline (A), postintervention (B) and at follow up (C) is depicted.

Abbreviations: MR = mitral regurgitation

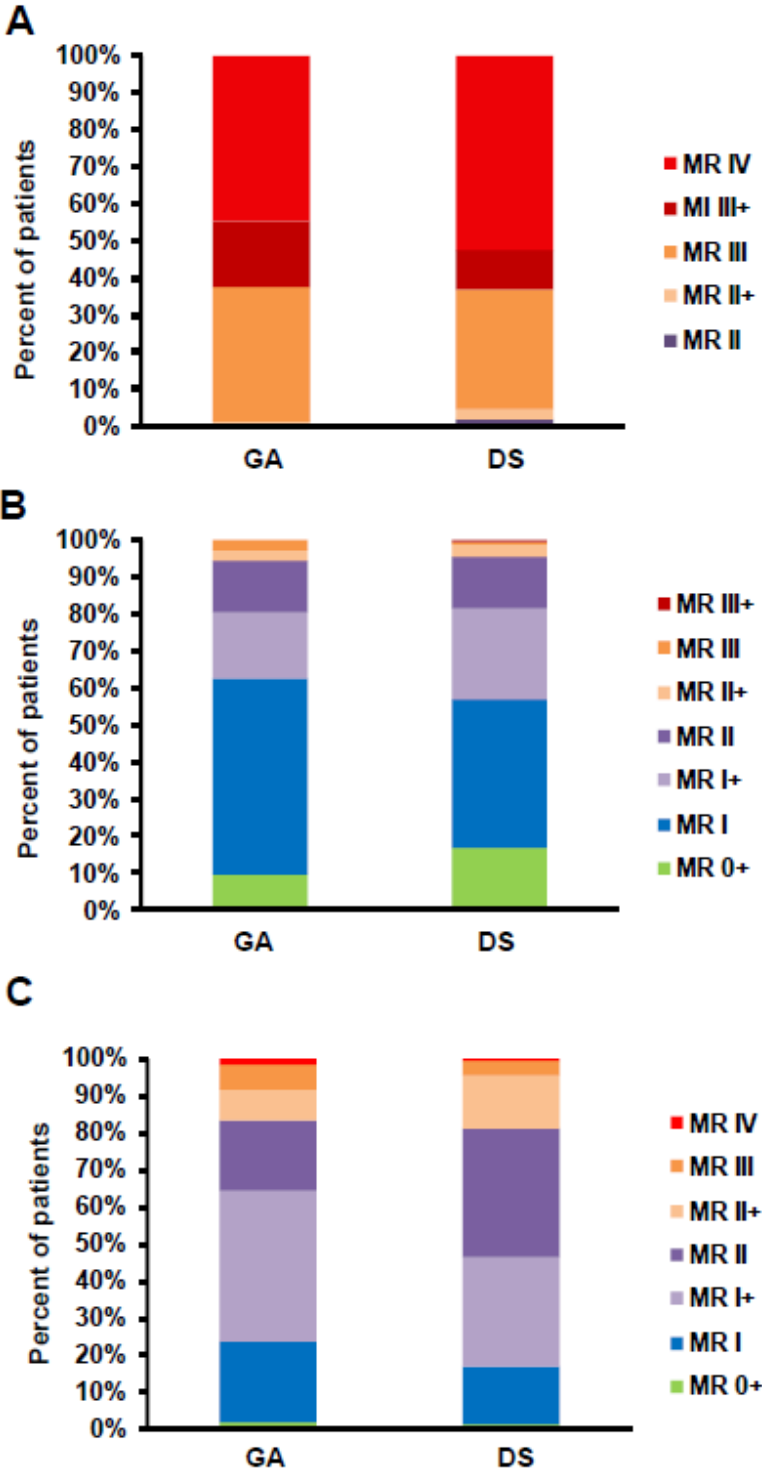

Supplement: JAH3-6-e007485-s001.pdf [file JAH3-6-e007485-s001.pdf]
